# Supplementary material for: Efficient CRISPR/Cas9-based genome editing and its application to conditional genetic analysis in Marchantia polymorpha
Source: PubMed Central journal article supplement (PMC6209168; doi:10.1371/journal.pone.0205117), 2018-10-31
Supplement: pone.0205117.s003.pdf [file pone.0205117.s003.pdf]

hCas9

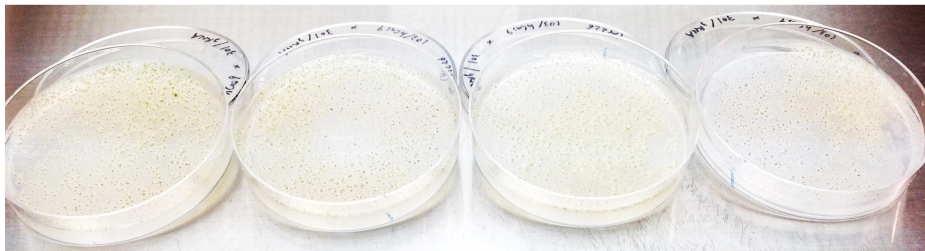

Atco-Cas9

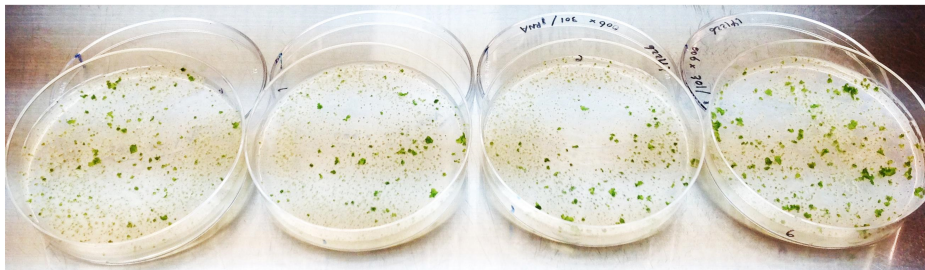

10  $\mu$ M NAA, 3 weeks
