# Supplementary material for: Efficient CRISPR/Cas9-based genome editing and its application to conditional genetic analysis in Marchantia polymorpha
Source: PubMed Central journal article supplement (PMC6209168; doi:10.1371/journal.pone.0205117), 2018-10-31

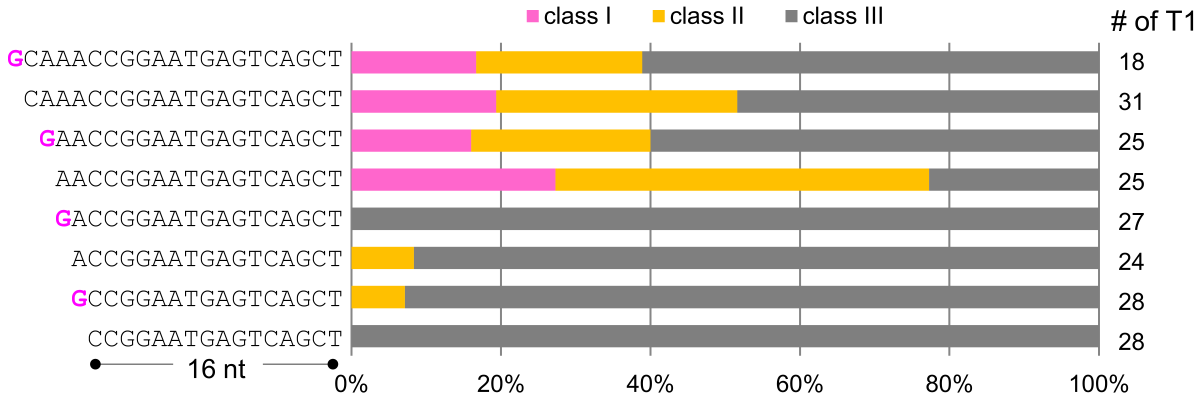

Supplement: pone.0205117.s005.pdf [file pone.0205117.s005.pdf]
