# Supplementary material for: Efficient CRISPR/Cas9-based genome editing and its application to conditional genetic analysis in Marchantia polymorpha
Source: PubMed Central journal article supplement (PMC6209168; doi:10.1371/journal.pone.0205117), 2018-10-31
Supplement: pone.0205117.s008.pdf [file pone.0205117.s008.pdf]

2-fold dilution series

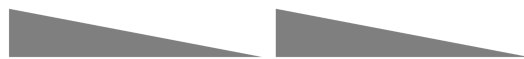

Atco-Cas9-NLS

hCas9-NLS

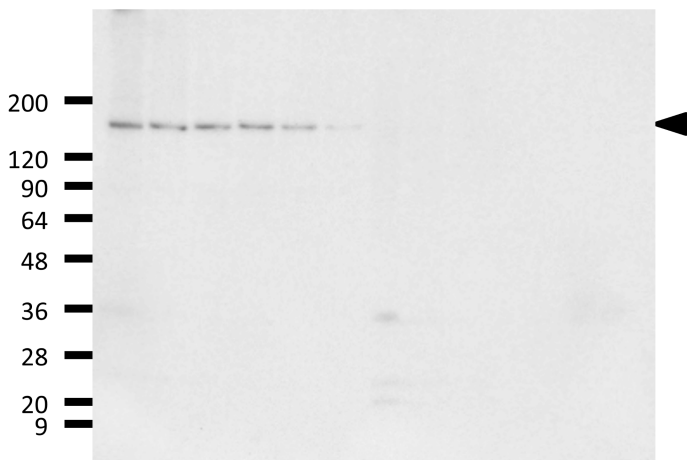

Anti-Cas9 antibody  
Cas9-NLS: 160 kDa

2-fold dilution series

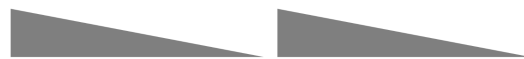

Atco-Cas9-NLS

hCas9-NLS

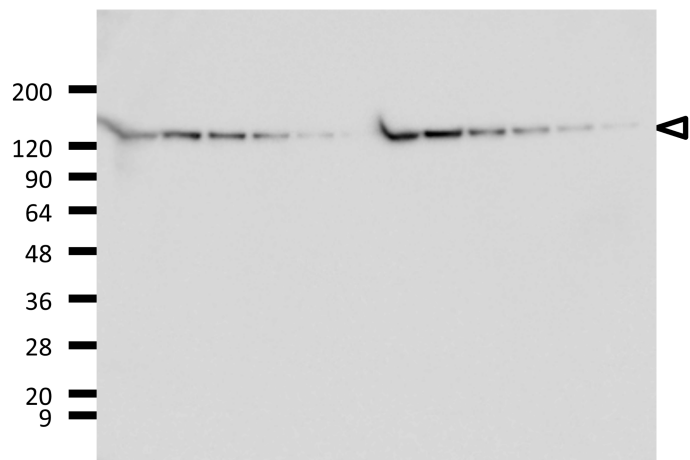

Anti-Mpphot antibody  
Mpphot: 123 kDa

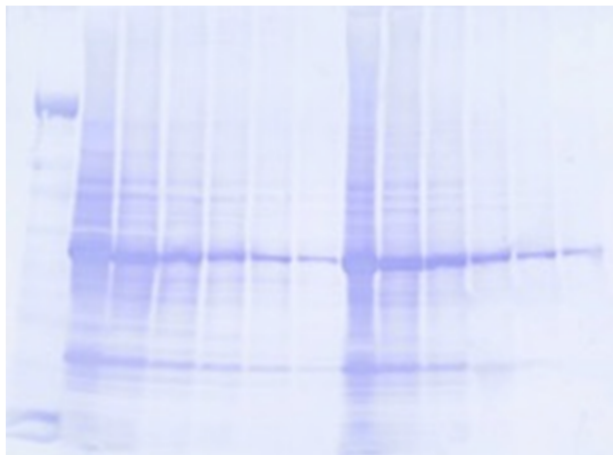

CBB staining

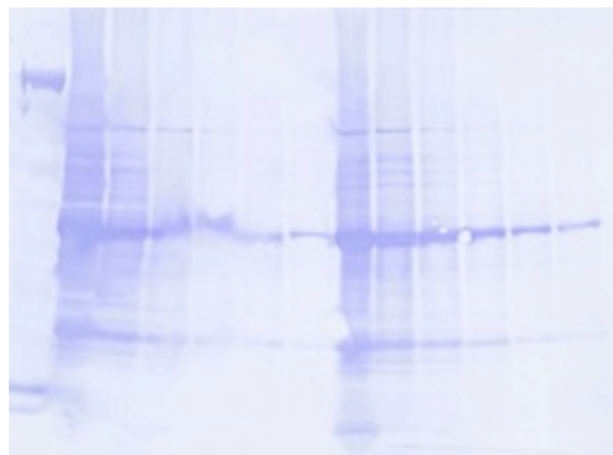

CBB staining
