# Supplementary material for: Efficient CRISPR/Cas9-based genome editing and its application to conditional genetic analysis in Marchantia polymorpha
Source: PubMed Central journal article supplement (PMC6209168; doi:10.1371/journal.pone.0205117), 2018-10-31

**A**

|              |                                                                                |
|--------------|--------------------------------------------------------------------------------|
| gRNA_ARF1_1  | 5'-----CGCAAGAGACCTTCATGATCAG-----GAGTGGCA-----3'                              |
| #13          | 5'-GCCCAGGAGCTTGTCGCAAGAGACCTTCATGATGAGCTTGTTCGCATGAGACCTTCA GAGTGGCACTTCCG-3' |
| MpARF1genome | 5'-GCCCAGGAGCTTGTCGCAAGAGACCTTCATGATCAG-----GAGTGGCACTTCCG-3'                  |
| Insertion    | 5'-----GAGCTTGTTCGCATGAGACCTTCA-----3'                                         |

**B***MpARF1*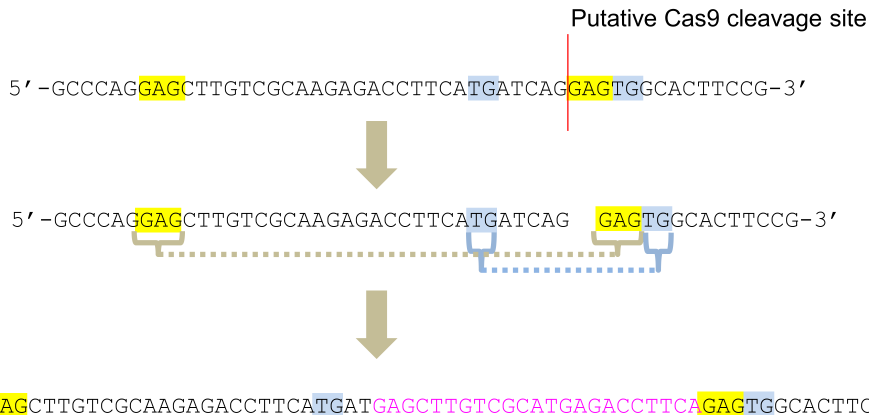

Supplement: pone.0205117.s009.pdf [file pone.0205117.s009.pdf]
