# Supplementary material for: Efficient CRISPR/Cas9-based genome editing and its application to conditional genetic analysis in Marchantia polymorpha
Source: PubMed Central journal article supplement (PMC6209168; doi:10.1371/journal.pone.0205117), 2018-10-31
Supplement: pone.0205117.s010.pdf [file pone.0205117.s010.pdf]

| Purpose                             | Name                                                                                                                                                                                                                                                                                | Sequence                                                                                                                                                                                                                                                                                                                                                                                                                                                                                   | Related figures      |
|-------------------------------------|-------------------------------------------------------------------------------------------------------------------------------------------------------------------------------------------------------------------------------------------------------------------------------------|--------------------------------------------------------------------------------------------------------------------------------------------------------------------------------------------------------------------------------------------------------------------------------------------------------------------------------------------------------------------------------------------------------------------------------------------------------------------------------------------|----------------------|
| Atco-Cas9 cloning                   | cacc_AtCas9_F                                                                                                                                                                                                                                                                       | 5'-CACCATGGATAAGAAGTACTCTATCGG-3'                                                                                                                                                                                                                                                                                                                                                                                                                                                          | Fig 1                |
| Atco-Cas9 cloning                   | Pea3Ter_R                                                                                                                                                                                                                                                                           | 5'-AAGCCTATACTGTACTTAACCTTGATT-3'                                                                                                                                                                                                                                                                                                                                                                                                                                                          |                      |
| Gateway cloning site amplification  | Infusion_GW_A51_F                                                                                                                                                                                                                                                                   | 5'-GTGGTTGATAACAGCGGTTGACTAGAGTTATCA-3'                                                                                                                                                                                                                                                                                                                                                                                                                                                    | Fig 2                |
| Gateway cloning site amplification  | Infusion_GW_A51_R                                                                                                                                                                                                                                                                   | 5'-ATTCGAGCTCTAAGCCTCTAAGCGCTGTTATCA-3'                                                                                                                                                                                                                                                                                                                                                                                                                                                    |                      |
| MpU6-1 cloning                      | Mp-U6_38003_F                                                                                                                                                                                                                                                                       | 5'-CACCTATTCATTCAAAGAGATTTTTAAAGATC-3'                                                                                                                                                                                                                                                                                                                                                                                                                                                     |                      |
| MpU6-1 cloning                      | Mp-U6_38003_R                                                                                                                                                                                                                                                                       | 5'-GAGAGGCTGGGTGCAAC-3'                                                                                                                                                                                                                                                                                                                                                                                                                                                                    |                      |
| ccdB site amplification             | OE-MpU6-CmRccdB-F2                                                                                                                                                                                                                                                                  | 5'-GCAGAGTTGCACCCAGCCTCTCgagctcATTAGGCACCCAGGCTTT-3'                                                                                                                                                                                                                                                                                                                                                                                                                                       |                      |
| ccdB site amplification             | gRNA-R3                                                                                                                                                                                                                                                                             | 5'-tagAAAAAAGCACCGACTCGGTG-3'                                                                                                                                                                                                                                                                                                                                                                                                                                                              |                      |
| pMpGE_En02 construction             | Bsal-Sp-sgRNA_F                                                                                                                                                                                                                                                                     | 5'-GACCCGAGAGAGGGTCTCAGTTTTAGAGCTAGAAAT-3'                                                                                                                                                                                                                                                                                                                                                                                                                                                 |                      |
| pMpGE_En02 construction             | gRNA_R                                                                                                                                                                                                                                                                              | 5'-GTGGCACCGAGTCGGTCTTTTTTCTA-3'                                                                                                                                                                                                                                                                                                                                                                                                                                                           |                      |
| pMpGE_En02 construction             | MpU6-1_500_F                                                                                                                                                                                                                                                                        | 5'-GTAACGTGAGACTACTAC-3'                                                                                                                                                                                                                                                                                                                                                                                                                                                                   |                      |
| pMpGE_En02 construction             | Bsal_MpU6_1R                                                                                                                                                                                                                                                                        | 5'-GACCCCTCTCGGTCTCCGAGAGGCTGGGTGCAAC-3'                                                                                                                                                                                                                                                                                                                                                                                                                                                   |                      |
| pMpGE_En03 construction             | Mp_oligo6Bsal_Gf                                                                                                                                                                                                                                                                    | 5'-TCTCGGAGACCCGAGAGAGGGTCTCA-3'                                                                                                                                                                                                                                                                                                                                                                                                                                                           |                      |
| pMpGE_En03 construction             | Mp_oligo6Bsal_Gr                                                                                                                                                                                                                                                                    | 5'-AAACTGAGACCCTCTCTCGGTCTCCC-3'                                                                                                                                                                                                                                                                                                                                                                                                                                                           |                      |
| pMpGE013 construction               | Mp_oligo5Aarl_Gf                                                                                                                                                                                                                                                                    | 5'-TCTCGAAATGCAGGTGATGACTCACCTGCATAA-3'                                                                                                                                                                                                                                                                                                                                                                                                                                                    |                      |
| pMpGE014 construction               | Mp_oligo5Aarl_Gr                                                                                                                                                                                                                                                                    | 5'-AAACTTATGCAGGTGAGTCATCACCTGCATTTTC-3'                                                                                                                                                                                                                                                                                                                                                                                                                                                   |                      |
| ARF1_1 gRNA                         | ARF1_sgRNA_F<br>ARF1_sgRNA_R                                                                                                                                                                                                                                                        | 5'-GCACCCAGCCTCTCGAGACCTTCATGATCAGGAGTTTTAGAGCTAGAA-3'<br>5'-TTCTAGCTCTAAACCTCCTGATCATGAAGGTCTCGAGAGGCTGGGTGC-3'                                                                                                                                                                                                                                                                                                                                                                           | Fig 3 and S4 Fig     |
| NOP1_1 gRNA for pMpGE_En01          | NOP1_sgRNA_F<br>NOP1_sgRNA_R                                                                                                                                                                                                                                                        | 5'-GCACCCAGCCTCTCGATAGTCTTTGTGAGAGAATTTTTAGAGCTAGAA-3'<br>5'-TTCTAGCTCTAAACATTCTCTCACAAGACTATCGAGAGGCTGGGTGC-3'                                                                                                                                                                                                                                                                                                                                                                            | Fig 3                |
| NOP1_1 gRNA for pMpGE_En02          | Mp_oligo2_F<br>Mp_oligo2_R                                                                                                                                                                                                                                                          | 5'-TCTCGATAGTCTTTGTGAGAGAAT-3'<br>5'-AAACATTCTCTCACAAGACTATC-3'                                                                                                                                                                                                                                                                                                                                                                                                                            | S4 Fig               |
| MpARF1 genotyping                   | ARF1_Seq_F3<br>ARF1_Seq_R3                                                                                                                                                                                                                                                          | 5'-GCCGATGTGCATATACCCAGCTATCCAGT-3'<br>5'-ATGTTATATCCTCGGTTGATTCTCGTACGA-3'                                                                                                                                                                                                                                                                                                                                                                                                                | Fig 1 and Fig 3      |
| MpNOP1 genotyping                   | CRISPR_NOP1_F<br>CRISPR_NOP1_R                                                                                                                                                                                                                                                      | 5'-ATGGAGCAAGTGCCTGTTGAGGGCTCTCG-3'<br>5'-CGTGAGGTGACGATGCCAGTCCGACCAG-3'                                                                                                                                                                                                                                                                                                                                                                                                                  | Fig 1 and Fig 3      |
| MpARF1 off targets genotyping_OT1   | ARF1_1_OT1_F2<br>ARF1_1_OT1_R2                                                                                                                                                                                                                                                      | 5'-CAAACAATGACAGGTGAACAGCG-3'<br>5'-CTTCAATGAGCGTTAGTGCGAGC-3'                                                                                                                                                                                                                                                                                                                                                                                                                             | Table 1              |
| MpARF1 off targets genotyping_OT2   | ARF1_1_OT2_F<br>ARF1_1_OT2_R                                                                                                                                                                                                                                                        | 5'-TCTCGTACTCGATCAAGATGGG-3'<br>5'-TTCCTCCCTCGGCATGGTTTC-3'                                                                                                                                                                                                                                                                                                                                                                                                                                |                      |
| MpARF1 off targets genotyping_OT3   | ARF1_1_OT3_F<br>ARF1_1_OT3_R                                                                                                                                                                                                                                                        | 5'-CATCCACTCCAGCTGTACCATC-3'<br>5'-TCCATGGGCCTTAGATTAGGAGG-3'                                                                                                                                                                                                                                                                                                                                                                                                                              |                      |
| MpNOP1 off targets genotyping_OT1   | NOP1_1_OT1_F<br>NOP1_1_OT1_R                                                                                                                                                                                                                                                        | 5'-CTCAACCATTGAACAGCGCTCGG-3'<br>5'-TTTGTCCAGTTAGGCTGCTCATC-3'                                                                                                                                                                                                                                                                                                                                                                                                                             | Table 1              |
| MpNOP1 off targets genotyping_OT2   | NOP1_1_OT2_F<br>NOP1_1_OT2_R                                                                                                                                                                                                                                                        | 5'-TCGGGGCCTGCTCATCGGGCTCC-3'<br>5'-GCTCAAGCTATGCCGAGGTCGTC-3'                                                                                                                                                                                                                                                                                                                                                                                                                             |                      |
| MpNOP1 off targets genotyping_OT3   | NOP1_1_OT3_F<br>NOP1_1_OT3_R                                                                                                                                                                                                                                                        | 5'-TGGATTCCCGCGTCTCCTGTTCC-3'<br>5'-TATTGGAATCGGCAGGACCGCGG-3'                                                                                                                                                                                                                                                                                                                                                                                                                             |                      |
| gRNA length assessment              | NOP1-2_20ntF<br>NOP1-2_20ntR<br>NOP1-2_19ntF<br>NOP1-2_19ntR<br>NOP1-2_18ntF<br>NOP1-2_18ntR<br>NOP1-2_17ntF<br>NOP1-2_17ntR<br>NOP1-2_16ntF<br>NOP1-2_16ntR<br>For addition of extra intial G<br>NOP1-2_20ntFg<br>NOP1-2_19ntFg<br>NOP1-2_18ntFg<br>NOP1-2_17ntFg<br>NOP1-2_16ntFg | 5'-tctcAAACCGGAATGAGTCAGCT-3'<br>5'-aaacAGCTGACTCATTCCGGTTG-3'<br>5'-tctcAAACCGGAATGAGTCAGCT-3'<br>5'-aaacAGCTGACTCATTCCGGTTT-3'<br>5'-tctcAACCGGAATGAGTCAGCT-3'<br>5'-aaacAGCTGACTCATTCCGGTT-3'<br>5'-tctcACCGGAATGAGTCAGCT-3'<br>5'-aaacAGCTGACTCATTCCGGT-3'<br>5'-tctcCCGGAATGAGTCAGCT-3'<br>5'-aaacAGCTGACTCATTCCGG-3'<br>5'-ctcgCAAACCGGAATGAGTCAGCT-3'<br>5'-ctcgAAACCGGAATGAGTCAGCT-3'<br>5'-ctcgAACCGGAATGAGTCAGCT-3'<br>5'-ctcgACCGGAATGAGTCAGCT-3'<br>5'-ctcgCCGGAATGAGTCAGCT-3' | Figs 4, 5 and S5 Fig |
| Larger deletion analysis genotyping | NOP1_05_F<br>NOP1_1k_R<br>NOP1_2k_R<br>NOP1_5k_R<br>For ds oligo DNA<br>NOP1_3_F<br>NOP1_3_R<br>NOP1_4_F<br>NOP1_4_R<br>NOP1_5_F<br>NOP1_5_R<br>NOP1_6_F<br>NOP1_6_R                                                                                                                | 5'-CCTCATGGATTTTATCGC-3'<br>5'-ACGATGGCACCAGCACT-3'<br>5'-TCCGACCTTTTGAACAC-3'<br>5'-CCAACAATATTCAGCGAC-3'<br>5'-CTCGATTAAGAGTGGAAGTTGCTT-3'<br>5'-AAACAAGCAACTTCCACTCTTAAT-3'<br>5'-CTCGAGCTTCTCCAAGTTCTGGTC-3'<br>5'-AAACGACCAGAACTTGGAGAAGCT-3'<br>5'-CTCGCAGTTTACACGGCCATGGT-3'<br>5'-AAACACCATGGCCGTGTGAACGTG-3'<br>5'-CTCGGAAGATCAAGCATGAATCAA-3'<br>5'-AAACTTGATTCATGCTTGATCTTC-3'                                                                                                  | Fig 6 and S6 Fig     |
| MpMPK1 gRNA                         | sgRNA_Bsa_MpMPK1_ex1t_F<br>sgRNA_Bsa_MpMPK1_ex1t_R                                                                                                                                                                                                                                  | 5'-tctcGGGGCCTACGGCATTGTC-3'<br>5'-aaacGACAATGCCGTAGGCCCC-3'                                                                                                                                                                                                                                                                                                                                                                                                                               | Fig 7                |
| MpMPK1 CRISPR genotyping and set 3  | MpMPK1_-549F<br>MpMPK1_g540R                                                                                                                                                                                                                                                        | 5'-GGTCGAACGCACCCTTGACAGC-3'<br>5'-CCAAAGTAGAGGCCATGCATGTG-3'                                                                                                                                                                                                                                                                                                                                                                                                                              |                      |
| MpMPK1 cDNA                         | MpMPK1_1F_TOPO                                                                                                                                                                                                                                                                      | 5'-caccATGGATTCGCGAGCAGCTGCCG-3'                                                                                                                                                                                                                                                                                                                                                                                                                                                           |                      |
| MpMPK1 cDNA and set 1               | MpMPK1_c1131R_STP                                                                                                                                                                                                                                                                   | 5'-CTATTGCATCATGTCTGGTAGGGG-3'                                                                                                                                                                                                                                                                                                                                                                                                                                                             |                      |
| Sets 1 and 2                        | MpEF-P_seqL1                                                                                                                                                                                                                                                                        | 5'-CCCCTTTGGTCAGTCTGT-3'                                                                                                                                                                                                                                                                                                                                                                                                                                                                   |                      |
| Set 2                               | tdTomato_753R                                                                                                                                                                                                                                                                       | 5'-GATGACGGCCATGTTGTTG-3'                                                                                                                                                                                                                                                                                                                                                                                                                                                                  |                      |
| Set 3                               | MpMPK1_g1010R                                                                                                                                                                                                                                                                       | 5'-CGAGACATCAGGGACACGGAAG-3'                                                                                                                                                                                                                                                                                                                                                                                                                                                               |                      |
| For pMpGWB337 series                | ccdB_236F<br>loxP_NruI_Sac_R<br>NOST_head_R_SacI<br>mCherry_CAGC_F<br>mTurq_CAGC_F<br>TagRFP_CAGC_F<br>tdTomato_CAGC_F<br>pUGW_Aor_mTurq_IF_F<br>pUGW_Aor_mTurq_Stp_IF_R                                                                                                            | 5'-AAGTGGCTGATCTCAGCCACC-3'<br>5'-TTCGAGCTCTTTTCGCGATAAATTCGTATAATGTATGC-3'<br>5'-CAGCATGAGCGAGCTGATTAAG-3'<br>5'-GATCGGGGAAATTCGAGCTC-3'<br>5'-CAGCATGGTGAGCAAGGGCG-3'<br>5'-CAGCATGGTGAGCAAGGGCGAGG-3'<br>5'-CAGCATGGTGCTAAGGGTGAGGAAC-3'<br>5'-GTGGTTGATAACAGCATGGTGTCTAAGGGTGAGGAAC-3'<br>5'-ATTCGAGCTCTAAGCCTATTTGTAAGCTCATCCATTCCG-3'                                                                                                                                                |                      |
